# Supplementary material for: Inherited Optic Neuropathies: Real-World Experience in the Paediatric Neuro-Ophthalmology Clinic
Source: MDPI journal article supplement (doi:10.3390/genes15020188), 2024-01-30
Supplement: s1 [file s1]

# Supplemental Material

## Methods

Electronic Medical Record (EMR) ("OpenEyes®") search strategy:

1. *Date of last appointment >1/1/2016 & <1/1/2021*
2. *Age <=16 at the time of the clinical interaction*
3. *Clinic letter containing the following words:*
  - a. *("optic" AND "disc" AND "pallor") OR*
  - b. *("optic" AND "disc" AND "pale") OR*
  - c. *("optic" AND "neuropathy") OR*
  - d. *("optic" AND "atrophy") OR*
  - e. *("Leber" AND "Optic" AND "Neuropathy") OR*
  - f. *("LHON") OR*
  - g. *("Dominant" AND "Optic" AND "Atrophy") OR*
  - h. *("DOA") OR*
  - i. *("OPA1")*

Supplementary Table S1 – Details of individual patients. BCVA – best corrected visual acuity at last visit (LogMAR); D – Dioptres, SE – Spherical equivalent; OCT – optical coherence tomography, EDT – electrodiagnostic testing, MRI – Magnetic resonance imaging (of the brain & orbits). Patients 1 to 9 – clinical details, no molecular diagnosis; Patients A-F - clinical details, genetic testing details in Table 1 in the main manuscript.

| Patient ID | Sex    | Ethnicity        | Comorbidities                   | Source of referral        | Genetic Diagnosis                              | Age at genetic diagnosis | BCVA (right) | BCVA (left) | Refraction D (SE) Right | Refraction D (SE) Left | OCT findings                                         | EDT findings              | MRI | Nutritional screen | Other tests sent                                                                                                                          |
|------------|--------|------------------|---------------------------------|---------------------------|------------------------------------------------|--------------------------|--------------|-------------|-------------------------|------------------------|------------------------------------------------------|---------------------------|-----|--------------------|-------------------------------------------------------------------------------------------------------------------------------------------|
| 1          | Male   | European (North) | No                              | Internal ophthalmologist  | None (see note)                                | 10                       | 1.20         | 1.20        | -8.75                   | -9.5                   | Disc atrophy, tilted disc                            | Inconclusive              | Yes | No                 | From a family with autosomal dominant <i>PAX6</i> aniridia - does not carry this mutation; currently considering further genetic testing. |
| 2          | Male   | South Asian      | Nystagmus, developmental delay. | Internal ophthalmologists | None (clear ON and nystagmus panels)           |                          | 0.40         | 0.40        | 6.5                     | 5.5                    | NA                                                   | Ganglion cell dysfunction | Yes | Yes                |                                                                                                                                           |
| 3          | Male   | South Asian      | No                              | Internal ophthalmologists | None (clear ON Panel)                          |                          | 0.00         | 0.00        | 2.25                    | 2.75                   | Temporal atrophy of Disc                             | No definite dysfunction   | Yes | Yes                |                                                                                                                                           |
| 4          | Female | European (North) | No                              | Internal ophthalmologists | None (clear ON, nystagmus and albinism panels) |                          | 0.60         | 0.76        | -1                      | -0.5                   | foveal depressions present, macula NAD, reduced RNFL | NA                        | Yes | Yes                |                                                                                                                                           |

|    |      |                  |                            |                          |                          |      |      |       |       |                                 |                           |     |     |                                                                                                                                                           |
|----|------|------------------|----------------------------|--------------------------|--------------------------|------|------|-------|-------|---------------------------------|---------------------------|-----|-----|-----------------------------------------------------------------------------------------------------------------------------------------------------------|
| 5  | Male | Black            | No                         | Internal ophthalmologist | Declined testing         | 0.40 | 0.00 | -9.75 | -3    | NA                              | Inconclusive              | Yes | No  |                                                                                                                                                           |
| 6  | Male | Black            | No                         | External ophthalmologist | None (clear LHON screen) | 0.20 | PL   | -1.75 | -1.75 | Temporal atrophy of Disc        | No VEP detectable         | Yes | No  | Lumbar puncture, bloods for AQP4, NMDA, MOG                                                                                                               |
| 7  | Male | European (North) | No                         | External ophthalmologist | None (clear ON panel)    | 0.40 | 0.40 | -0.25 | -0.5  | Thinning of peri-papillary RNFL | Ganglion cell dysfunction | Yes | Yes | LFT, UE, ANA, FBC, ACE, syphilis                                                                                                                          |
| 8  | Male | Black            | No                         | External ophthalmologist | None (clear ON panel)    | NA   | NA   | NA    | NA    | NA                              | NA                        | No  | No  |                                                                                                                                                           |
| 9  | Male | South Asian      | No                         | Internal ophthalmologist | None (clear ON panel)    | 0.10 | 0.14 | NA    | NA    | Thinning of peri-papillary RNFL | Ganglion cell dysfunction | Yes | Yes |                                                                                                                                                           |
| 10 | Male | South Asian      | No                         | Internal ophthalmologist | None (clear ON panel)    | 0.54 | 0.52 | 0.25  | 0.5   | NA                              | Ganglion cell dysfunction | Yes | Yes |                                                                                                                                                           |
| 11 | Male | European (North) | Autistic spectrum disorder | Optometrist              | None (Clear ON panel )   | 0.00 | NPL  | NA    | NA    | Thinning of peri-papillary RNFL | No VEP detectable         | Yes | Yes | Copper, ESR, FBC, selenium, vit A, D, E, TFT, LFT, cortisol, UE, CRP. Found to have low b12/folate & vitamin A - supplemented not thought to be causative |

|   |        |                  |       |                          |                      |    |      |      |       |       |                                                       |                           |     |     |                                                             |
|---|--------|------------------|-------|--------------------------|----------------------|----|------|------|-------|-------|-------------------------------------------------------|---------------------------|-----|-----|-------------------------------------------------------------|
| A | Female | European (South) | No    | Internal ophthalmologist | OPA1<br>c.635_636del | 16 | 0.34 | 0.22 | NA    | NA    | Temporal atrophy of Disc                              | No definite dysfunction   | Yes | Yes |                                                             |
| B | Male   | South Asian      | No    | Internal ophthalmologist | OPA1<br>c.1608+1G>A  | 16 | 0.48 | 0.56 | -0.75 | -0.75 | Temporal atrophy of Disc                              | Ganglion cell dysfunction | Yes | Yes |                                                             |
| C | Female | Other            | No    | Internal ophthalmologist | MTND3<br>m.10197G>A  | 16 | 1.40 | 1.40 | 0.5   | 0.25  | Thinning of peri-papillary RNFL                       | Ganglion cell dysfunction | No  | Yes | AQP4, MOG, Goldman field                                    |
| D | Male   | Black            | No    | Internal ophthalmologist | MTND6<br>m.14484T>C  | 6  | 0.20 | 0.20 | NA    | NA    | Thinning of peri-papillary RNFL                       | Ganglion cell dysfunction | Yes | Yes | Inflammatory & infectious screens, AQP4, MOG, Goldman field |
| E | Female | European (North) | No    | External ophthalmologist | MTND6<br>m.14475A>G  | 12 | 1.50 | 1.20 | 5.38  | 3     | Peri-papillary RNFL thinning; loss of GCL over macula | Ganglion cell dysfunction | Yes | Yes |                                                             |
| F | Female | European (North) | CAPOS | Paediatrician            | ATP1A3<br>.c.2452G>A | 6  | 0.70 | 0.70 | -3.5  | -3.5  | Temporal atrophy of Disc                              | NA                        | No  | No  |                                                             |

---

|   |        |                     |                     |                             |                                                     |    |      |      |      |     |    |    |    |    |
|---|--------|---------------------|---------------------|-----------------------------|-----------------------------------------------------|----|------|------|------|-----|----|----|----|----|
| G | Female | European<br>(North) | Wolfram<br>Syndrome | External<br>ophthalmologist | WFS1<br>c.2648_2651delTCTT;<br>c.6+3G>T             | 11 | 1.00 | LP   | -5.5 | -6  | NA | NA | No | No |
| H | Male   | South<br>Asian      | Leigh<br>Syndrome   | Paediatrician               | SURF1<br>c.792_793del;<br>c.[792_793del;809_826dup] | 4  | 0.20 | 0.23 | 3.5  | 3.5 | NA | NA | No | No |

---
